# Supplementary material for: Family attitudes about and experiences with medical cannabis in children with cancer or epilepsy: an exploratory qualitative study
Source: PubMed Central journal article supplement — CMAJ Open. 2021 May 21;9(2):E563–9. doi: 10.9778/cmajo.20200212 (PMC8177908; doi:10.9778/cmajo.20200212), 2021-05-21
Supplement: supp_9.2.E563_2020-0212-1-at.pdf [file supp_9.2.E563_2020-0212-1-at.pdf]

## APPENDIX A: Interview Guide

1. How did your child decide to use Cannabis?
2. What are the reasons that your child is using cannabis?
3. How did you learn about cannabis use for your child?
4. Who is signing the medical form?
5. What have you learned from talking to other families in clinic who also use cannabis? (If you haven't, why haven't you talked to other families?)
6. What have you learned from talking to your primary physician, physician or nurse about using cannabis? (If you haven't, why haven't you talked to them?)
7. Can you talk about the pressures of using/not using marijuana for medical purposes?
8. Do you think that cannabis is a good treatment for your child and why?
9. Is your child currently using cannabis for medical purposes?
10. How long has/did your child use cannabis?
11. How did you choose the dosage?
12. How did you choose the supplier?
13. Who advised you about strain, usage, other details?
14. How much do/did you pay (per month)?
15. What are/were the effect that cannabis has had on your child? Are/were these the affects you hoped for?
16. Would you use cannabis for medical purposes in the future for your child or would you recommend the use of cannabis for medical purposes to other pediatric patients?
17. Are you using any non-traditional medicine/therapies for your child? What are they?
18. Why do/don't you use non-traditional type of therapies?
19. What are your main concerns about the medicines your child/teenager receives?
20. How did you consider issues around safety of cannabis? (drug safety, not criminal safety)
21. How did you manage concerns about legality of cannabis (i.e., getting caught)?
22. Can you talk about what you know about side effects of cannabis?
23. Has your child/teenager had any issues with cannabis treatments? (Side-effects, dosage issues).
24. What do you know about how medicinal cannabis is regulated in Canada?
25. How would your use of cannabis change if there was a Health Canada certified product for children, made by a drug company?
26. From your perspective, what do we need to do as health care providers to support the families in the decision making process of medical use of cannabis?
