# Supplementary material for: Family attitudes about and experiences with medical cannabis in children with cancer or epilepsy: an exploratory qualitative study
Source: PubMed Central journal article supplement — CMAJ Open. 2021 May 21;9(2):E563–9. doi: 10.9778/cmajo.20200212 (PMC8177908; doi:10.9778/cmajo.20200212), 2021-05-21
Supplement: supp_9.2.E563_2020-0212-original-submission.pdf [file supp_9.2.E563_2020-0212-original-submission.pdf]

1  
2  
3 **Family attitudes and experiences with medicinal cannabis in pediatrics: An exploratory**  
4 **qualitative study**  
5

6 Marissa Gibbard<sup>a,b</sup>, BSc, Dawn Mount<sup>a,b</sup>, BA, ECE, Shahrar R. Rassekh<sup>b,c</sup>, MD, MHS, Harold  
7 (Hal) Siden<sup>b,c</sup>, MD, MHS  
8  
9

10 **Affiliations:** <sup>a</sup> BC Children's Hospital Research Institute, Vancouver, British Columbia; <sup>b</sup> The  
11 University of British Columbia, Vancouver, British Columbia; <sup>c</sup> BC Children's Hospital,  
12 Vancouver, British Columbia  
13

14 **Address correspondence to:** Hal Siden, Department of Pediatrics, BC Children's Hospital,  
15 F612 – 4480 Oak Street, Vancouver, BC, V6H 3N1, [hsiden@bcchr.ca], 604-875-2776  
16  
17

18 **Funding Statement:** No external funding for this manuscript. The authors have no financial  
19 relationships relevant to this article to disclose.  
20

21 **Competing Interests:** The authors have no conflicts of interest relevant to this article to  
22 disclose.  
23  
24  
25  
26  
27  
28  
29  
30  
31  
32  
33  
34  
35  
36  
37  
38  
39  
40  
41  
42  
43  
44  
45  
46  
47  
48  
49  
50  
51  
52  
53  
54  
55  
56  
57  
58  
59  
60

## Abstract

**Background:** In 2018, Canada became the second nation to fully legalize cannabis for recreational and medicinal use. This exploratory qualitative study investigated how and why families use medicinal cannabis for their children's health conditions in the context of full legalization and widespread acceptance.

**Methods:** Semi-structured interviews were conducted with 10 parents of pediatric patients attending BC Children's Hospital Oncology Clinic or Canuck Place Children's Hospice, who currently or previously used any type of cannabis for medicinal purposes. Participants were recruited through posters, email, or referral. Interviews included open-ended questions about the child's cannabis use. Interviews were recorded, transcribed, and thematic analysis was performed following an Interpretive Description framework.

**Results:** Patient age ranged from 22-months to 16-years. Primary reasons for cannabis use were epilepsy, cancer treatment, and chemotherapy management. Children were seen as being severely ill, and trying non-standard treatments was therefore warranted. Parents viewed cannabis as both a serious drug that doctors should prescribe, and a natural alternative health product, safe to pursue on one's own. Parents lacked information about medicinal cannabis from health care providers, and sought information and support from social media, dispensary employees, and other families. Parents were willing to obtain cannabis for their child despite reporting high costs, lack of resources and evidence, and uncertain safety or quality.

**Interpretation:** A sense of parental love and responsibility underlay parental decision making regarding cannabis for their children. Parents pursued medicinal cannabis regardless of obstacles, and needed reliable, unbiased sources of information to access on their own.

## INTRODUCTION

Use of medicinal cannabis in pediatrics entered widespread public consciousness in 2013, when the CNN television network aired “WEED”, a documentary highlighting therapeutic benefits of cannabis in children with severe epilepsies.<sup>1</sup> Over the past decade, medicinal cannabis for pediatric patients has continued to gain societal and scientific attention.<sup>2-5</sup> In 2018, Canada became the second nation to legalize cannabis for recreational and medicinal use. This exploratory qualitative study investigated how and why families use medicinal cannabis for children in the context of legalization and widespread acceptance.

Cannabis contains two main cannabinoids with proposed medicinal effects; cannabidiol (CBD), and delta-9-tetrahydrocannabinol (THC),<sup>6</sup> though other bio-active compounds may be present. We use the term medicinal cannabis for any combination of CBD and THC. CBD reduces seizure frequency and duration in children with treatment resistant epilepsies,<sup>7</sup> specifically patients with Dravet Syndrome.<sup>8-10</sup> THC is known to have anti-emetic, appetite stimulation, and analgesic effects useful for chemotherapy management.<sup>11-15</sup> Some oncology patients also seek cannabis for anti-tumor effects, despite lack of scientific evidence.<sup>15</sup>

Families in Canada can access cannabis products multiple ways. Products produced under pharmaceutical regulations (Controlled Drugs and Substances Act (S.C. 1996, c. 19)) assigned a Drug Information Number (DIN) are available via prescription as semi-synthetic drugs such as nabilone,<sup>16</sup> or highly purified plant-derived drugs such as nabixomols.<sup>17</sup> Non-pharmaceutical, standardized cannabis extracts can be accessed with medical authorization from over 150 producers, licensed under the Cannabis Act (S.C. 2018, c. 16). Lastly, caregivers may obtain

1  
2  
3 artisanal cannabis from recreational or grey/black market sources<sup>18,19</sup> without medical  
4 authorization. Products can be purchased from “dispensaries” where the provenance of the  
5 cannabis is unknown, acquired from others, or grown and processed at home.  
6  
7  
8  
9

10  
11  
12 There is a lack of robust evidence to guide cannabis practices across pediatric medical  
13 disciplines.<sup>2,20,21</sup> The Canadian Pediatric Society does not support pediatric medicinal cannabis  
14 use except for carefully considered, case-by-case bases, due to limited evidence and potential  
15 harms.<sup>2</sup> Additionally, few studies have explored family attitudes and experiences with pediatric  
16 medicinal cannabis<sup>3,22,23</sup>; most have focused on treatment types and parent-reported outcomes.<sup>24-</sup>  
17  
18  
19  
20  
21  
22  
23  
24  
25  
26  
27  
28  
29  
30  
31  
32  
33  
34  
35  
36  
37  
38  
39  
28 None have explored family experiences in Canada. Initiative to use cannabis products for  
children in absence of clear efficacy and safety data, along with increasing access in Canada,  
compels a better understanding of family perspectives. We aimed to explore attitudes and  
experiences of families using pediatric medicinal cannabis in Canada to set the stage for further  
studies.

## 40 41 42 43 44 45 46 47 48 49 50 51 52 53 54 55 56 57 58 59 60

### **METHODS**

Upon ethics approval (H18-01112), participants were recruited through posters in clinics, email,  
or referral. Participants were parents/legal guardians of patients (<18 years old) attending BC  
Children’s Hospital Oncology Clinic and/or Canuck Place Children’s Hospice, who currently or  
previously used any form of cannabis for medicinal purposes. Palliative Care, where incidence of  
neurological disorders and epilepsy is high, and Oncology were chosen to represent areas of  
known pediatric cannabis use<sup>4,11</sup> while offering a variety of experiences. Participants were  
excluded if they did not speak English. Informed consent was obtained prior to participation.

1  
2  
3 In spring 2019, a qualitative semi-structured interview method was used to interview parents of  
4 10 patients as individuals or with a spouse, without children present. An interview guide  
5 (Appendix A) developed by the study team outlined open-ended questions regarding the child's  
6 medicinal cannabis use, including current practices, decision making, perceived effects, safety,  
7 and legality. Interviews were conducted by trained interviewers (MG, DM) in person or by  
8 phone and lasted one hour.  
9  
10  
11  
12  
13  
14  
15  
16  
17  
18

19 Interviews were voice recorded, transcribed, de-identified, and added to Nvivo 12™ software for  
20 analysis.<sup>29</sup> Thematic analysis was performed following the Interpretive Description framework,  
21 developed by Thorne.<sup>30</sup> This framework is helpful when prior understanding of a phenomenon is  
22 limited, and is intended for use in healthcare to identify information for further investigation.<sup>30</sup>  
23 Team members coded interview content into categories that arose from the data, without pre-  
24 determined themes. Themes were then developed to exemplify priority areas that emerged. Data  
25 were analyzed separately by two team members (MG, CH), compared, and discrepancies  
26 discussed with a third member (HS).  
27  
28  
29  
30  
31  
32  
33  
34  
35  
36  
37  
38  
39

## 40 **RESULTS**

41  
42 Nine mothers and one mother/father pair completed interviews. Patient characteristics are  
43 described in Table 1. Product sources and types are described in Table 2. Products included  
44 edible oils with varied cannabinoid concentrations, nasal spray, and dried cannabis for smoking.  
45 Duration of use ranged from 2 weeks to 4 years. We identified 5 themes and 9 sub-themes (Table  
46 3).  
47  
48  
49  
50  
51  
52  
53  
54  
55  
56  
57  
58  
59  
60

## 1. Child and family context

This theme included reasons for pediatric use, based on diagnosis and condition severity. It also encompassed parents' self-obtained knowledge and practical proficiency. This was important, as usual sources of information, such as nurses and pharmacists, could not provide guidance.

Children were perceived as being severely ill, so trying non-standard treatments was considered warranted [Sub-theme 1.1]. Management of epilepsy or chemotherapy side-effects were the primary reasons for use. Other desired outcomes included reduced pharmaceutical use, reduced anxiety, and anti-tumor activity. Children were taking multiple medications or treatments in addition to cannabis, such as "*doing chemo for her second relapse.*" Parents sought cannabis "*out of desperation,*" when traditional medications were not as effective as desired:

"As a parent of a child with a terminal illness, we are more focused on the quality of life...Sometimes I felt like our daughter was going to die if we didn't do something about the seizure stuff."

Parents relied on themselves as experts on their child's cannabis treatment [1.2]. They conveyed precise details about dose and contents of products, despite often using unregulated products.

Parents described fluctuating cannabis dose or frequency over time, and shared other practicalities:

"We administer it via G-tube and we have...a really fatty substance that we can flush it with. Apparently the CBD oil needs fat in order to work best."

## 2. Decision process

Decision Process describes myriad complex factors that influenced parents' decisions surrounding cannabis. Most interview time was spent on this theme.

Parents received information about medicinal benefits, product types and practicalities through health care providers and informal sources: friends and family, media, online advocacy groups, and cannabis retail employees [2.1, 2.2, 2.3]. Despite reporting a mass of information online, parents described a significant lack of trusted medical information to guide decisions, especially if care providers were unsupportive [2.2, 2.3].

“If your doctor is not open to talk about it, then your next line of research is the internet... Being able to decipher biased and unbiased opinions running through parent forums...is really hard.”

Parents described difficulty deciding on cannabis sources. To obtain cannabis for children legally, doctors provided authorization to show licensed retailers. Families wanted more doctors to be open to suggesting and authorizing use [2.2]. However, parents indicated that local dispensaries offered easy access to cannabis; they could discuss their needs with staff and make purchases with few roadblocks [2.1]. Trust in cannabis product contents and consistency, along with prices and reputation were crucial when choosing dispensaries.

Parents experienced pressure both to use and not use cannabis [2.4]. A mother described that, after her pediatrician would not provide authorization, “[I] felt pressure to not use it because I

1  
2  
3 *respect her opinion as a professional.*” However, lack of support did not deter parents from  
4 seeking cannabis; they turned to community sources or switched care providers. Most families  
5 reported social acceptance with pressure *to* use medicinal cannabis, and were advocates  
6 themselves.  
7  
8  
9  
10  
11  
12

13 “Even though my daughter is only 5 years old, I want to empower her and know there is  
14 nothing wrong with [using medicinal cannabis]...I am really open about it.”  
15  
16  
17  
18  
19  
20  
21

22 Parents felt they were experimenting with cannabis [2.5]. They needed to learn through trial and  
23 error, and rely on their own observations because “*people’s bodies are so different, not*  
24 *everything is going to work.*” They identified a lack of “*empiricism*” to guide decisions, and  
25 hoped for more research to inform dosing and safety.  
26  
27  
28  
29  
30  
31  
32  
33

### 34 **3.0 Cannabis as an ambiguous medicine:**

35  
36 Cannabis was special in that parents viewed it simultaneously as a drug and as an alternative  
37 health product [3.0]. They wanted cannabis to be seen as equivalent to the regulated  
38 pharmaceuticals their children used, equating medicinal cannabis and standard oncology  
39 treatment: “[compared to cannabis] *there’s way worse side effects when you do chemotherapy*  
40 *and radiation.*” Others saw cannabis as distinct from standard medications, one parent preferring  
41 to “*get some seizure management with CBD than pharmaceuticals*”. The ambiguity of cannabis  
42 was summarized by one parent who explained “*But it’s not even a medication! It’s like oil! It’s*  
43 *like getting Omega 3,*” yet later described “*Just like any other drug, it can work for some...it*  
44 *should be one of the medications that [doctors] recommend.*”  
45  
46  
47  
48  
49  
50  
51  
52  
53  
54  
55  
56  
57  
58  
59  
60



#### 4. Perceived effects

Parents described observed effects and concerns about use. Eight parents noted beneficial effects.

Some saw dramatic changes; “*We were having 50-80 [seizures] a day, and on the cannabis we were... down to one a week.*” Others saw improvements but were unsure how much to attribute to cannabis. Parents also described the ability to reduce other medications as a significant benefit: “*We got him off quite a few, 20 medications. And we are on 3 with the cannabis.*” Two families saw no changes despite increasing dose or changing suppliers. Five families observed undesired effects such as fatigue, drowsiness, or slight intoxication.

Parents reported few concerns about long- or short-term side-effects of cannabis use. Side-effects of cannabis were considered insignificant compared to side-effects of pharmaceuticals; most parents were entirely unconcerned.

“My son is already high on all this pharmaceutical shit he has been on, so for me, [cannabis] doesn’t really make a difference.”

#### 5. Legal and financial landscape

Parents described navigating a complex legal environment and financial stress of obtaining cannabis. Families lacked a clear process to legally access medicinal cannabis, with uncertainty where to begin. Parents wanted resources to clarify Canadian laws. They did not have good understanding of cannabis regulations, and felt their child’s cannabis use was in a legal “*grey area*” [5.1]. Those who obtained cannabis online from outside of Canada were concerned about risk of incarceration, and others “*worried about it not coming... it being intercepted at the post*

1  
2  
3 *office.*” Inability to travel outside of Canada with their child’s medication was another major  
4  
5 concern because it restricted family life.  
6  
7

8  
9  
10 The amount of money that parents spent on medicinal cannabis varied based on product and  
11  
12 dosing schedule [5.2]. Insurers did not cover cannabis products, so families had to pay out of  
13  
14 pocket.  
15

16  
17  
18 “I am a single mom and it’s a huge bill at the end of the month, but I do it because it’s  
19  
20 saving my kid’s life... Maybe if it was regulated like a pharmaceutical, I would be able to  
21  
22 get it covered and it would take a huge stress off of me.”  
23

24  
25 Cost was a major challenge that limited dosing schedule. Parents reported that authorized  
26  
27 products were taxed like recreational cannabis in Canada. Some found it “*cheaper*” to obtain  
28  
29 products through illegal routes, though these were still “*very expensive*”.  
30  
31

## 32 33 34 35 **INTERPRETATION**

36  
37  
38 Our study describes family experiences as a first step to uncover family practices and attitudes  
39  
40 around pediatric medicinal cannabis. To our knowledge, this is the first such investigation in  
41  
42 Canada. The Canadian context adds a special perspective, as medicinal and recreational cannabis  
43  
44 are legal nation-wide and there are a unique variety of legal and illegal avenues parents use to  
45  
46 access cannabis for their children. We uncovered five overlapping areas of focus: child and  
47  
48 family context, decision process, cannabis as an ambiguous medicine, perceived effects, and  
49  
50 legal and financial landscape. Underlying these was a deep-rooted sense of parental love and  
51  
52  
53  
54  
55  
56  
57  
58  
59  
60

1  
2  
3 responsibility. Families were determined to improve their child's quality of life regardless of  
4  
5 social or legal consequences, and felt responsibility to help their child, no matter what.  
6

7  
8 "It was just a matter of having my daughter... not just do whatever I can to keep her alive  
9  
10 but also to make sure she lives a life that is fulfilling and like she is a happy kid."  
11

12  
13  
14 Parents identified significant challenges, including lack of reliable information and research, and  
15  
16 costs of- and access to- licensed medicinal products. Physicians' personal beliefs were another  
17  
18 hurdle that families had to navigate alone. These challenges contrasted to strong feelings of hope  
19  
20 or praise for products and their effects. Willingness to overcome challenges demonstrated the  
21  
22 importance of cannabis as a treatment option and directly reflected parents' sense of  
23  
24 responsibility to help their children. Desire for care providers to offer cannabis, alongside  
25  
26 willingness to use it without medical guidance, demonstrated the unique category of medicinal  
27  
28 cannabis; parents felt it was a serious medication that doctors should prescribe, yet still a safe  
29  
30 alternative to pursue on one's own.<sup>3</sup> Despite viewing cannabis as an alternative health product,  
31  
32 parents wanted medical providers to offer cannabis treatments, and were disappointed in  
33  
34 providers who refused.  
35  
36  
37  
38  
39  
40  
41

42  
43 Studies of health care provider perspectives have reported concerns about physical and mental  
44  
45 side effects of medicinal cannabis,<sup>31-33</sup> but our participants reported few of these concerns.  
46  
47 Condition severity may have influenced lack of concern, as nearly all children had life-long or  
48  
49 terminal conditions. Yet, participants still spoke openly about concern with trade-offs when  
50  
51 accessing legal or illegal sources. Illegal sources were described as cheaper and easier to access  
52  
53 than legal products, but were less trustworthy, likely because they are not subject to the rigorous  
54  
55  
56  
57  
58  
59  
60

1  
2  
3 quality, safety, and labelling standards of licensed products in Canada.<sup>34</sup> Others have identified  
4  
5 similar parental concerns when accessing cannabis.<sup>3,23,24</sup> Again, underlying parental love and  
6  
7 conflict emerged as families made difficult decisions about if and how they would access  
8  
9 cannabis.  
10

11  
12  
13  
14  
15 Our results suggest that some parents will pursue medicinal cannabis treatments for their  
16  
17 children despite obstacles, and thus indicate the need for reliable, unbiased sources of  
18  
19 information that parents can access. Resources should reflect the Canadian context of public  
20  
21 access to varied product sources and qualities. The abundance of conflicting online information  
22  
23 about pediatric medicinal cannabis<sup>5</sup> is a result of the lack of scientific evidence on efficacy and  
24  
25 current practices. As such, our findings underscore the need for evidence to inform pediatric  
26  
27 guidelines on safety, dosing, best products and practices for medicinal cannabis. Many others  
28  
29 have reported similar needs for accurate efficacy, dosing, and safety information.<sup>4,11,20,22,28,35</sup>  
30  
31 Robust pharmacological, clinical, and epidemiological research in these areas will directly  
32  
33 address challenges identified by our participants, and should be a priority of medical and  
34  
35 scientific communities.  
36  
37  
38  
39  
40  
41

42  
43 Small sample size and local context may limit generalizability of our findings. However, this  
44  
45 allowed us to provide detailed insight into unique experiences and needs within a Canadian  
46  
47 community that may reflect other pediatric palliative circles. Selection bias may have been  
48  
49 another limitation, as families who did not feel stigmatized might have been more likely to  
50  
51 participate. We did not speak to children directly, and notably, no adolescents who used cannabis  
52  
53 recreationally; this should be a separate project. We did not explore parental use of cannabis, and  
54  
55  
56  
57  
58  
59  
60

1  
2  
3 this may be a factor in acceptance; it will be explored in future studies. Requiring families speak  
4  
5 English may have limited participation of immigrant families.  
6  
7  
8  
9

10 This study is the first step in a larger research program of pediatric medicinal cannabis that  
11  
12 includes a site-wide prevalence survey, longitudinal collection of observational data,  
13  
14 pharmacokinetics research, and a Canada-wide registry and cannabis network.  
15  
16  
17  
18  
19  
20  
21  
22  
23  
24  
25  
26  
27  
28  
29  
30  
31  
32  
33  
34  
35  
36  
37  
38  
39  
40  
41  
42  
43  
44  
45  
46  
47  
48  
49  
50  
51  
52  
53  
54  
55  
56  
57  
58  
59  
60

Confidential

1  
2  
3  
4  
5  
6  
7  
8  
9  
10  
11  
12  
13  
14  
15  
16  
17  
18  
19  
20  
21  
22  
23  
24  
25  
26  
27  
28  
29  
30  
31  
32  
33  
34  
35  
36  
37  
38  
39  
40  
41  
42  
43  
44  
45  
46  
47  
48  
49  
50  
51  
52  
53  
54  
55  
56  
57  
58  
59  
60

**Acknowledgements**

Thank you to Christina Han for her assistance analysing the data, and to Colleen Pawliuk for library and informational sciences support, as well as editing. Thank you also to the Evidence to Innovation Theme at BC Children’s Hospital Research Institute for supporting this project.

Confidential

## REFERENCES

1. Gupta S. Why I changed my mind on weed. *CNN*. August 8, 2013. <https://www.cnn.com/2013/08/08/health/gupta-changed-mind-marijuana/index.html>. Updated August 08, 2013. Accessed March 5, 2020.
2. Rieder MJ, Canadian Paediatric Society, Drug Therapy and Hazardous Substances Committee. Is the medical use of cannabis a therapeutic option for children? *Paediatr Child Health*. 2016;21(1):31-34. doi:10.1093/pch/21.1.31
3. Sobo EJ. Parent use of cannabis for intractable pediatric epilepsy: Everyday empiricism and the boundaries of scientific medicine. *Soc Sci Med*. 2017;190:190-198. doi:10.1016/j.socscimed.2017.08.003
4. Wong SS, Wilens TE. Medical cannabinoids in children and adolescents: A systematic review. *Pediatrics*. 2017;140(5). doi:10.1542/peds.2017-1818
5. Yeung M, Wroot H, Charnock C, Forbes C, Lafay-Cousin L, Schulte F. Cannabis use in pediatric cancer patients: what are they reading? A review of the online literature. *Support Care Cancer*. Published online January 20, 2020. doi:10.1007/s00520-020-05306-2
6. Health Canada. Information for health care professionals: Cannabis (marihuana, marijuana) and the cannabinoids. <https://www.canada.ca/en/health-canada/services/drugs-medication/cannabis/information-medical-practitioners/information-health-care-professionals-cannabis-cannabinoids.html>. Published October 2018. Accessed March 5, 2020.
7. Pawliuk C, Chau B, Rassekh SR, McKellar T, Siden H. Efficacy and safety of pediatric medicinal cannabis use: A scoping review. *Paediatr Child Health*. 2020;pxaa031. doi:10.1093/pch/pxaa031
8. Ali S, Scheffer IE, Sadleir LG. Efficacy of cannabinoids in paediatric epilepsy. *Dev Med Child Neurol*. 2019;61(1):13-18. doi:10.1111/dmcn.14087
9. Devinsky O, Cross JH, Laux L, et al. Trial of cannabidiol for drug-resistant seizures in the Dravet syndrome. *New Engl J Med*. 2017;376(21):2011-2020. doi:10.1056/NEJMoa1611618
10. McCoy B, Wang L, Zak M, et al. A prospective open-label trial of a CBD/THC cannabis oil in dravet syndrome. *Ann Clin Transl Neurol*. 2018;5(9):1077-1088. doi:10.1002/acn3.621
11. Ananth P, Reed-Weston A, Wolfe J. Medical marijuana in pediatric oncology: A review of the evidence and implications for practice. *Pediatr Blood Cancer*. 2018;65(2). doi:10.1002/pbc.26826
12. Tramèr MR, Carroll D, Campbell FA, Reynolds DJ, Moore RA, McQuay HJ. Cannabinoids for control of chemotherapy induced nausea and vomiting: quantitative systematic review. *BMJ*. 2001;323(7303):16-21. doi:10.1136/bmj.323.7303.16

13. Strasser F, Luftner D, Possinger K, et al. Comparison of orally administered cannabis extract and delta-9-tetrahydrocannabinol in treating patients with cancer-related anorexia-cachexia syndrome: A multicenter, phase III, randomized, double-blind, placebo-controlled clinical trial from the Cannabis-In-Cachexia-Study-Group. *J Clin Oncol*. 2006;24(21):3394-3400. doi:10.1200/JCO.2005.05.1847
14. Johnson JR, Burnell-Nugent M, Lossignol D, Ganae-Motan ED, Potts R, Fallon MT. Multicenter, double-blind, randomized, placebo-controlled, parallel-group study of the efficacy, safety, and tolerability of THC:CBD extract and THC extract in patients with intractable cancer-related pain. *J Pain Symptom Manage*. 2010;39(2):167-179. doi:10.1016/j.jpainsymman.2009.06.008
15. Whiting PF, Wolff RF, Deshpande S, et al. Cannabinoids for Medical Use: A Systematic Review and Meta-analysis. *JAMA*. 2015;313(24):2456-2473. doi:10.1001/jama.2015.6358
16. Valeant Pharmaceuticals International. CESAMET™ (nabilone) Capsules for oral administration. [https://www.accessdata.fda.gov/drugsatfda\\_docs/label/2006/018677s011lbl.pdf](https://www.accessdata.fda.gov/drugsatfda_docs/label/2006/018677s011lbl.pdf). Revised May 2006. Accessed April 21, 2020.
17. Health Canada. SATIVEX® - Fact sheet. <https://www.canada.ca/en/health-canada/services/drugs-health-products/drug-products/notice-compliance/conditions/fact-sheet-sativex.html>. Published April 13, 2005. Accessed March 5, 2020.
18. Eagland N. BC cracks down on unlicensed pot shops with raids in Victoria and Kamloops. Vancouver Sun. August 1, 2019. <https://vancouversun.com/cannabis/cannabis-business/b-c-cracks-down-on-unlicensed-pot-shops-with-raids-in-victoria-and-kamloops>. Updated August 1, 2019. Accessed March 4, 2020.
19. Rocca R. Toronto using concrete blocks to prevent unlicensed marijuana dispensaries from reopening. Global News. June 8, 2019. <https://globalnews.ca/news/5369230/cement-blocks-illegal-marijuana-dispensaries/>. Updated June 9, 2019. Accessed March 6, 2020.
20. Carter GT, Weydt P, Kyashna-Tocha M, Abrams DI. Medicinal cannabis: Rational guidelines for dosing. *IDrugs*. 2004;7(5):464-470.
21. Alcorn J, Vuong S, Wu F, Seifert B, Lyon A. Pediatric dosing considerations for medical cannabis. In: Costain W, ed. *Recent Advances in Cannabinoid Research*. London, UK: IntechOpen; 2019:181-200. doi:10.5772/intechopen.85399
22. Klotz KA, Schönberger J, Nakamura L, et al. Expectations and knowledge of cannabidiol therapy for childhood epilepsy — A German caregiver survey. *Epilepsy & Behavior*. 2020;111. doi:10.1016/j.yebeh.2020.107268
23. Suraev A, Lintzeris N, Stuart J, et al. Composition and use of cannabis extracts for childhood epilepsy in the Australian community. *Scientific Reports*. 2018;8(1):1-14. doi:10.1038/s41598-018-28127-0



- 1
  - 2
  - 3
  - 4
  - 5
  - 6
  - 7
  - 8
  - 9
  - 10
  - 11
  - 12
  - 13
  - 14
  - 15
  - 16
  - 17
  - 18
  - 19
  - 20
  - 21
  - 22
  - 23
  - 24
  - 25
  - 26
  - 27
  - 28
  - 29
  - 30
  - 31
  - 32
  - 33
  - 34
  - 35
  - 36
  - 37
  - 38
  - 39
  - 40
  - 41
  - 42
  - 43
  - 44
  - 45
  - 46
  - 47
  - 48
  - 49
  - 50
  - 51
  - 52
  - 53
  - 54
  - 55
  - 56
  - 57
  - 58
  - 59
  - 60
24. Suraev AS, Todd L, Bowen MT, et al. An Australian nationwide survey on medicinal cannabis use for epilepsy: History of antiepileptic drug treatment predicts medicinal cannabis use. *Epilepsy Behav.* 2017;70(Pt B):334-340. doi:10.1016/j.yebeh.2017.02.005
25. Barchel D, Stolar O, De-Haan T, et al. Oral cannabidiol use in children with autism spectrum disorder to treat related symptoms and co-morbidities. *Front Pharmacol.* 2018;9:1521. doi:10.3389/fphar.2018.01521
26. Hussain SA, Zhou R, Jacobson C, et al. Perceived efficacy of cannabidiol-enriched cannabis extracts for treatment of pediatric epilepsy: A potential role for infantile spasms and Lennox-Gastaut syndrome. *Epilepsy Behav.* 2015;47:138-141. doi:10.1016/j.yebeh.2015.04.009
27. Aguirre-Velázquez CG. Report from a survey of parents regarding the use of cannabidiol (medicinal cannabis) in Mexican children with refractory epilepsy. *Neurol Res Int.* 2017;2017. doi:10.1155/2017/2985729
28. Porter BE, Jacobson C. Report of a parent survey of cannabidiol-enriched cannabis use in pediatric treatment-resistant epilepsy. *Epilepsy Behav.* 2013;29(3):574-577. doi:10.1016/j.yebeh.2013.08.037
29. QSR International. *NVivo Qualitative Data Analysis Software [Computer Program]. Version 12.* Victoria, Australia: QSR International Pty Ltd; 2018
30. Thorne S. *Interpretive Description: Qualitative Research for Applied Practice.* Routledge; 2016. doi:10.4324/9781315545196
31. McGriff D, Anderson S, Arneson T. Early survey results from the Minnesota Medical Cannabis Program. *Minn Med.* 2016;99(4):18-22. [https://www.mnmed.org/MMA/media/Minnesota-Medicine-Magazine/Clinical\\_McGriff.pdf](https://www.mnmed.org/MMA/media/Minnesota-Medicine-Magazine/Clinical_McGriff.pdf). Published June 2016. Accessed March 5, 2020.
32. Canadian Paediatric Society. Canadian Paediatric Surveillance Program 2017 Results. [https://www.cpsp.cps.ca/uploads/publications/CPSP-2017-Results\\_1.pdf](https://www.cpsp.cps.ca/uploads/publications/CPSP-2017-Results_1.pdf). Published 2018. Accessed March 5, 2020.
33. Ananth P, Ma C, Al-Sayegh H, et al. Provider perspectives on use of medical marijuana in children with cancer. *Pediatrics.* 2018;141(1). doi:10.1542/peds.2017-0559
34. Cannabis Legalization and Regulation. Government of Canada Department of Justice. <https://www.justice.gc.ca/eng/cj-jp/cannabis/>. Updated October 17, 2019. Accessed March 5, 2020.
35. Klotz KA, Schulze-Bonhage A, Antonio-Arce VS, Jacobs J. Cannabidiol for treatment of childhood epilepsy-A cross-sectional survey. *Front Neurol.* 2018;9:731. doi:10.3389/fneur.2018.00731

**Table 1: Patient characteristics**

| <b>Age</b> | <b>Sex</b> | <b>Condition</b>          | <b>Primary Reason for Use</b>        |
|------------|------------|---------------------------|--------------------------------------|
| 5 years    | Female     | Cancer                    | Cancer and chemotherapy side effects |
| 8 years    | Female     | Cancer                    | Cancer and chemotherapy side effects |
| 16 years   | Male       | Cancer                    | Cancer and chemotherapy side effects |
| 9 years    | Female     | Cancer                    | Cancer and chemotherapy side effects |
| 8 years    | Male       | Neurological/neurogenetic | Epilepsy                             |
| 16 years   | Male       | Neurological/neurogenetic | Epilepsy                             |
| 22 months  | Male       | Neurological/neurogenetic | Epilepsy                             |
| 3 years    | Female     | Neurological/neurogenetic | Epilepsy                             |
| 14 years   | Female     | Neurological/neurogenetic | Epilepsy                             |
| 13 years   | Male       | Neurological/neurogenetic | Epilepsy                             |

Confidential

**Table 2: Source and type of cannabis products**

| <b>Source</b>                            | <b>Product Type<sup>a</sup></b>                               | <b>Number of participants</b> |
|------------------------------------------|---------------------------------------------------------------|-------------------------------|
| Community dispensary/online              | Non-standardized products (artisanal)                         | 3                             |
| Medical authorization                    | Non-pharmaceutical, standardized extracts (licensed products) | 5                             |
| Both community and medical authorization | Artisanal & non-pharmaceutical standardized extracts          | 2                             |

<sup>a</sup>Categorization based on Pawliuk et al.<sup>7</sup>

Confidential

**Table 3: Themes and Sub-Themes from interviews**

| Theme                       | Sub-theme                                    | Remarks                                                                                                                                                                                                                                                                                                                                                                 |
|-----------------------------|----------------------------------------------|-------------------------------------------------------------------------------------------------------------------------------------------------------------------------------------------------------------------------------------------------------------------------------------------------------------------------------------------------------------------------|
| 1. Child and family context | 1.1 Child's condition and severity           | <p>Child's medical challenges and diagnoses, reasons for using cannabis</p> <p><i>"Cannabis is the lesser of two evils."</i></p> <p><i>"There is no cure for what he has. So, it's a quality of life thing. We also hoped that it would help with his sleep, with his body movements, with his pains, with his dystonia"</i></p>                                        |
|                             | 1.2 Practicalities and parent expertise      | <p>Information on cannabis product type, contents, dose, and dosing schedule</p> <p><i>"[The product] is 97% CBD and 3% THC"</i></p> <p>Practical considerations and precise knowledge about administering or using cannabis and methods of administration</p> <p><i>"He can't have edibles because he will throw them up [due to chemotherapy]"</i></p>                |
| 2. Decision Process         | 2.1 Suppliers and advocates                  | <p>How parents learned about cannabis and their experiences with community and online dispensaries, support groups, and advocacy groups.</p> <p><i>"All of the information I get from my friends, from Facebook sometimes."</i></p> <p><i>"[Dispensary staff taught us] how much to dose a person for their weight and their age and what they are dosing for."</i></p> |
|                             | 2.2 Communication with health care providers | <p>Interactions with their child's health care providers and process of accessing authorization</p> <p><i>"I know the doctor doesn't like us to give it to our daughter".</i></p>                                                                                                                                                                                       |
|                             | 2.3 Lack of reliable information             | <p>Resources that parents accessed for information on medicinal cannabis, and their desire for trusted information.</p> <p><i>"If doctors could say, 'okay go to this link' and they have accurate or resourceful information for you to read about cannabis, that would be helpful for parents."</i></p>                                                               |
|                             | 2.4 Peer and social pressure                 | <p>Perceptions of personal or social pressures regarding cannabis for their child.</p> <p><i>"I think socially things have made a lot of progress and people are accepting. It might be due to the legalization of [recreational] marijuana."</i></p>                                                                                                                   |

|                                      |                       |                                                                                                                                                                                                                                                                                                                                                                                                                                                                                                                                                                |
|--------------------------------------|-----------------------|----------------------------------------------------------------------------------------------------------------------------------------------------------------------------------------------------------------------------------------------------------------------------------------------------------------------------------------------------------------------------------------------------------------------------------------------------------------------------------------------------------------------------------------------------------------|
|                                      | 2.5 Need for research | <p>Feelings of uncertainty and experimentation with their child due to lack of scientific evidence.</p> <p><i>“I was trying to figure out a dosage and I was being told mixed messages... I think I am giving her enough right now, but I don’t know”.</i></p> <p><i>“It would be nice if they could actually do some sort of research where they can see that her body is changing by using [cannabis].”</i></p>                                                                                                                                              |
| 3. Cannabis as an ambiguous medicine |                       | <p>Perceptions of cannabis as both a regular medication and an alternative health product.</p> <p><i>“Cannabis is just more natural”</i></p> <p><i>“Our son is very complex...He needs real drugs”, referring to cannabis.</i></p>                                                                                                                                                                                                                                                                                                                             |
| 4. Perceived effects                 |                       | <p>Parent observations of desired effects, undesired effects, or no effects that cannabis had their child.</p> <p><i>“He can function. He isn’t a zombie and doped up [from seizure medication]...I am quite pleased with where we are at right now.”</i></p> <p>A better alternative to pharmaceuticals for their child.</p> <p><i>“[Cannabis] is not opium...it is not going to put him into a coma and he is not going to die and all these things. Whereas I think he overdosed multiple times on Valium because we were trying to stop seizures”.</i></p> |
| 5. Legal and financial landscape     | 5.1 Regulations       | <p>Understanding of medicinal cannabis regulations in Canada and concerns about legal repercussions.</p> <p><i>“Our only issue is when we cross the border [for international travel]... We cannot fly with him because he needs to take his medication with him and [cannabis] medication cannot be taken [across borders].”</i></p>                                                                                                                                                                                                                          |
|                                      | 5.2 Costs             | <p>Information on product pricing, financial challenges, insurance coverage, and taxation of medicinal cannabis.</p> <p><i>“A 60ml bottle of the oil is \$135... We go through 2 bottles a month”</i></p> <p><i>“It is costing us \$318 a month...we would really like to double the dose but that that would be about \$650.”</i></p>                                                                                                                                                                                                                         |

**APPENDIX A: Interview Guide**

1. How did your child decide to use Cannabis?
2. What are the reasons that your child is using cannabis?
3. How did you learn about cannabis use for your child?
4. Who is signing the medical form?
5. What have you learned from talking to other families in clinic who also use cannabis?  
(If you haven't, why haven't you talked to other families?)
6. What have you learned from talking to your primary physician, physician or nurse about using cannabis? (If you haven't, why haven't you talked to them?)
7. Can you talk about the pressures of using/not using marijuana for medical purposes?
8. Do you think that cannabis is a good treatment for your child and why?
9. Is your child currently using cannabis for medical purposes?
10. How long has/did your child use cannabis?
11. How did you choose the dosage?
12. How did you choose the supplier?
13. Who advised you about strain, usage, other details?
14. How much do/did you pay (per month)?
15. What are/were the effect that cannabis has had on your child? Are/were these the affects you hoped for?
16. Would you use cannabis for medical purposes in the future for your child or would you recommend the use of cannabis for medical purposes to other pediatric patients?
17. Are you using any non-traditional medicine/therapies for your child? What are they?
18. Why do/don't you use non-traditional type of therapies?
19. What are your main concerns about the medicines your child/teenager receives?
20. How did you consider issues around safety of cannabis? (drug safety, not criminal safety)
21. How did you manage concerns about legality of cannabis (i.e., getting caught)?
22. Can you talk about what you know about side effects of cannabis?
23. Has your child/teenager had any issues with cannabis treatments? (Side-effects, dosage issues).
24. What do you know about how medicinal cannabis is regulated in Canada?
25. How would your use of cannabis change if there was a Health Canada certified product for children, made by a drug company?
26. From your perspective, what do we need to do as health care providers to support the families in the decision making process of medical use of cannabis?
