# Supplementary material for: Family attitudes about and experiences with medical cannabis in children with cancer or epilepsy: an exploratory qualitative study
Source: PubMed Central journal article supplement — CMAJ Open. 2021 May 21;9(2):E563–9. doi: 10.9778/cmajo.20200212 (PMC8177908; doi:10.9778/cmajo.20200212), 2021-05-21
Supplement: supp_9.2.E563_coreq.pdf [file supp_9.2.E563_coreq.pdf]

## SUPPLEMENT 1: COREQ 32-ITEM CHECKLIST

Tong A, Sainsbury P, Craig J. (2007) Consolidated criteria for reporting qualitative research (COREQ): a 32-item checklist for interviews and focus groups. *International Journal for Quality in Healthcare*: 19:349 – 357

| No. Item                                      | Guide questions/description                                           | Reported on Page #  |
|-----------------------------------------------|-----------------------------------------------------------------------|---------------------|
| Domain 1: Research team and reflexivity       |                                                                       |                     |
| 1. Interviewer/facilitator                    | Which author/s conducted the interview?                               | 4                   |
| 2. Credentials                                | What were the researcher's credentials?                               | 4-5                 |
| 3. Occupation                                 | What was their occupation at the time of the study?                   | 4                   |
| 4. Gender                                     | Was the researcher male or female?                                    | 4                   |
| 5. Experience and training                    | What experience or training did the researcher have?                  | 4-5                 |
| 6. Relationship with participants established | Was a relationship established prior to study commencement?           | 4-5                 |
| 7. Participant knowledge of the interviewer   | What did the participants know about the researcher?                  | 4-5                 |
| 8. Interviewer characteristics                | What characteristics were reported about the interviewer/facilitator? | 4-5                 |
| Domain 2: study design                        |                                                                       |                     |
| 9. Methodological orientation and Theory      | What methodological orientation was stated to underpin the study?     | 5                   |
| 10. Sampling                                  | How were participants selected?                                       | 4                   |
| 11. Method of approach                        | How were participants approached?                                     | 4                   |
| 12. Sample size                               | How many participants were in the study?                              | 4                   |
| 13. Non-participation                         | How many people refused to participate or dropped out? Reasons?       | 5                   |
| 14. Setting of data collection                | Where was the data collected?                                         | 4-5                 |
| 15. Presence of non-participants              | Was anyone else present besides the participants and researchers?     | 4                   |
| 16. Description of sample                     | What are the important characteristics of the sample?                 | 5, Table 1, Table 2 |
| 17. Interview guide                           | Were questions, prompts, guides provided by the authors?              | 5, Appendix A       |
| 18. Repeat interviews                         | Were repeat interviews carried out?                                   | 5                   |
| 19. Audio/visual recording                    | Did the research use audio or visual recording to collect the data?   | 5                   |
| 20. Field notes                               | Were field notes made during and/or                                   | 5                   |

|                                    |                                                                                                         |               |
|------------------------------------|---------------------------------------------------------------------------------------------------------|---------------|
|                                    | after the interview?                                                                                    |               |
| 21. Duration                       | What was the duration of the interviews                                                                 | 5             |
| 22. Data saturation                | Was data saturation discussed?                                                                          | 5             |
| 23. Transcripts returned           | Were transcripts returned to participants for comment and/or correction?                                | No            |
| Domain 3: analysis and findings    |                                                                                                         |               |
| 24. Number of data coders          | How many data coders coded the data?                                                                    | Pg.5          |
| 25. Description of the coding tree | Did authors provide a description of the coding tree?                                                   | Table 3       |
| 26. Derivation of themes           | Were themes identified in advance or derived from the data?                                             | 5             |
| 27. Software                       | What software, if applicable, was used to manage the data?                                              | 5             |
| 28. Participant checking           | Did participants provide feedback on the findings?                                                      | No            |
| 29. Quotations presented           | Were participant quotations presented to illustrate the themes/findings? Was each quotation identified? | 6-10, Table 3 |
| 30. Data and findings consistent   | Was there consistency between the data presented and the findings?                                      | 6-10, Table 3 |
| 31. Clarity of major themes        | Were major themes clearly presented in the findings?                                                    | 6-10, Table 3 |
| 32. Clarity of minor themes        | Is there a description of diverse cases or discussion of minor themes?                                  | 6-10, Table 3 |
